# Supplementary material for: A robust and water-stable two-fold interpenetrated metal–organic framework containing both rigid tetrapodal carboxylate and rigid bifunctional nitrogen linkers exhibiting selective CO2 capture
Source: Royal Society of Chemistry journal article supplement (doi:10.1039/c8dt03844a), 2018-11-21
Supplement: c8dt03844a1.pdf [file c8dt03844a1.pdf]

## **Electronic Supplementary Information**

### **A robust and water-stable two-fold interpenetrated metal organic framework containing both rigid tetrapodal carboxylate and rigid bifunctional nitrogen linkers exhibiting selective CO<sub>2</sub> capture†**

Vijay Gupta and Sanjay K. Mandal\*

*Department of Chemical Sciences, Indian Institute of Science Education and Research Mohali,  
Sector 81, Manauli PO, S.A.S. Nagar, Mohali, Punjab 140306, India*

#### **Corresponding Author**

\*E-mail: [sanjaymandal@iisermohali.ac.in](mailto:sanjaymandal@iisermohali.ac.in)

## Table of Contents

| Item         | Description                                                                                                                    | Page No. |
|--------------|--------------------------------------------------------------------------------------------------------------------------------|----------|
| Scheme S1    | Solvothermal synthesis of <b>1</b>                                                                                             | S3       |
| Fig. S1-S4   | Additional crystal structure figures for <b>1</b>                                                                              | S3-S5    |
| Fig. S5      | Powder X ray diffraction pattern for <b>1</b>                                                                                  | S5       |
| Fig. S6-S7   | FTIR spectra of H <sub>4</sub> L and <b>1</b>                                                                                  | S6       |
| Fig. S8      | UV-Vis spectra of H <sub>4</sub> L and <b>1</b>                                                                                | S7       |
| Fig. S9      | Thermogravimetric analysis and calculation for determining squeezed out solvent molecules in the crystal structure of <b>1</b> | S8       |
| Fig. S10     | FESEM images for <b>1</b>                                                                                                      | S9       |
| Fig. S11-S12 | FTIR spectrum and PXRD pattern of de-solvated <b>1</b>                                                                         | S9-S10   |
| Fig. S13-S15 | BET and Langmuir surface area determination from the CO <sub>2</sub> adsorption isotherm of <b>1</b>                           | S10-S11  |
| Fig. S16     | Hydrogen adsorption-desorption isotherm for <b>1</b>                                                                           | S12      |
| Fig. S17-S21 | Virial graph analysis for the calculation of isosteric heat of adsorption for CO <sub>2</sub>                                  | S12-S15  |
| Fig. S22-S27 | Calculation for gas selectivity and fitting of adsorption isotherms                                                            | S16-S19  |
| Fig. S28-S29 | <sup>1</sup> H and <sup>13</sup> C NMR of H <sub>4</sub> L                                                                     | S20      |
| Table S1     | Fitting parameters for virial graph analysis                                                                                   | S14      |
| Table S2     | Fitting parameters for Langmuir-Freundlich fits                                                                                | S19      |
| Table S3     | Single crystal data and refinement parameters for <b>1</b>                                                                     | S21      |
| Table S4     | Selected bond lengths and bond angles for <b>1</b>                                                                             | S22      |
| Tables S5-S6 | Isosteric heat of adsorption and gas selectivity values of reported MOFs                                                       | S23-S26  |

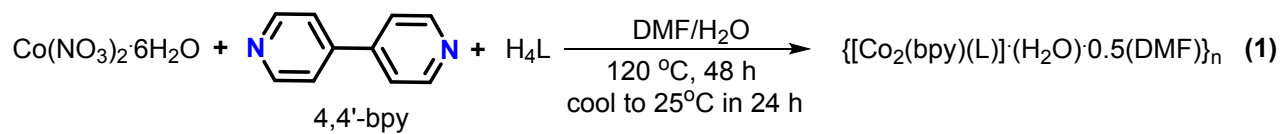

**Scheme S1** Solvothermal synthesis of **1**.

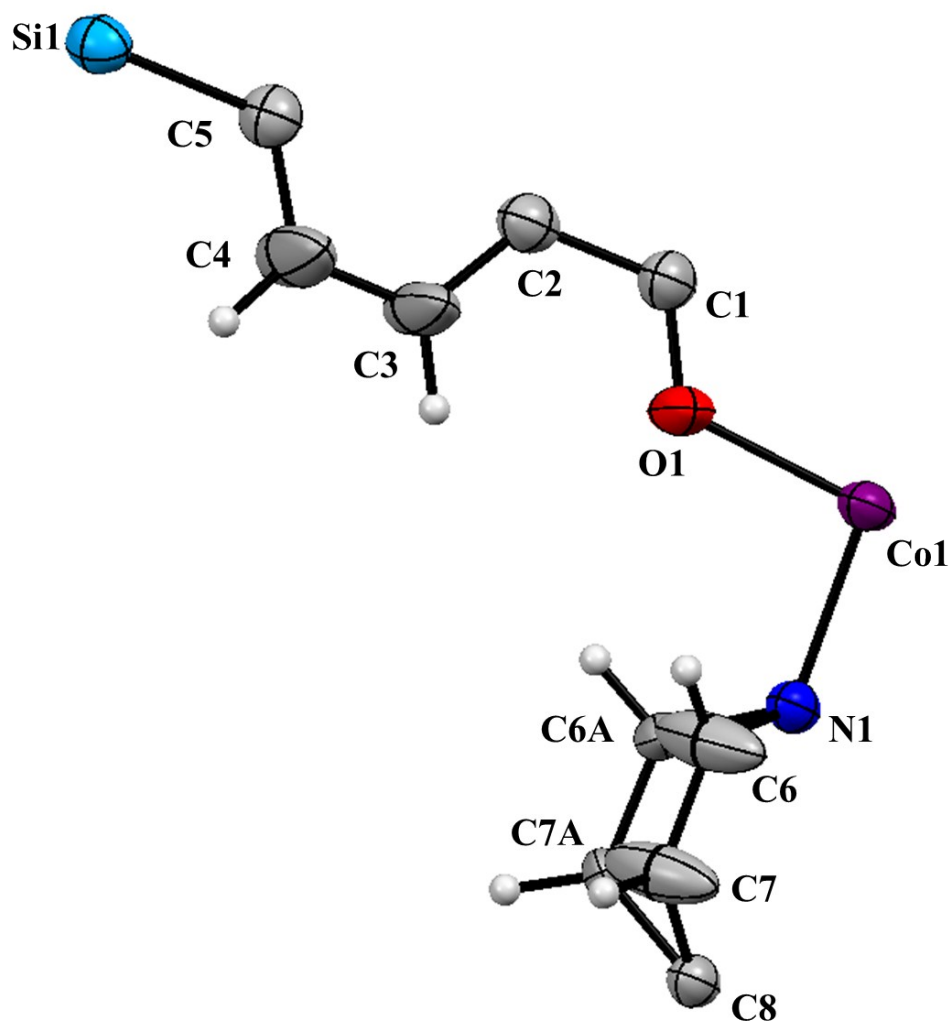

**Fig. S1** View of the asymmetric unit in **1**.

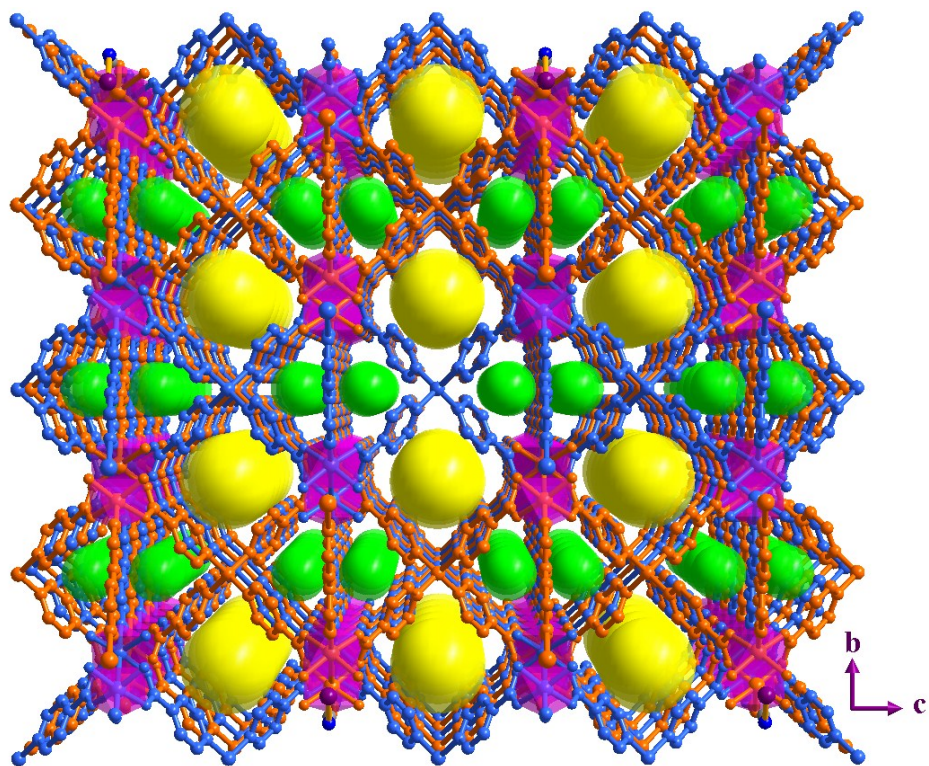

**Fig. S2** View of two types of channels in doubly-interpenetrated framework of **1** (along  $a$ -axis) shown by dummy balls in different colors.

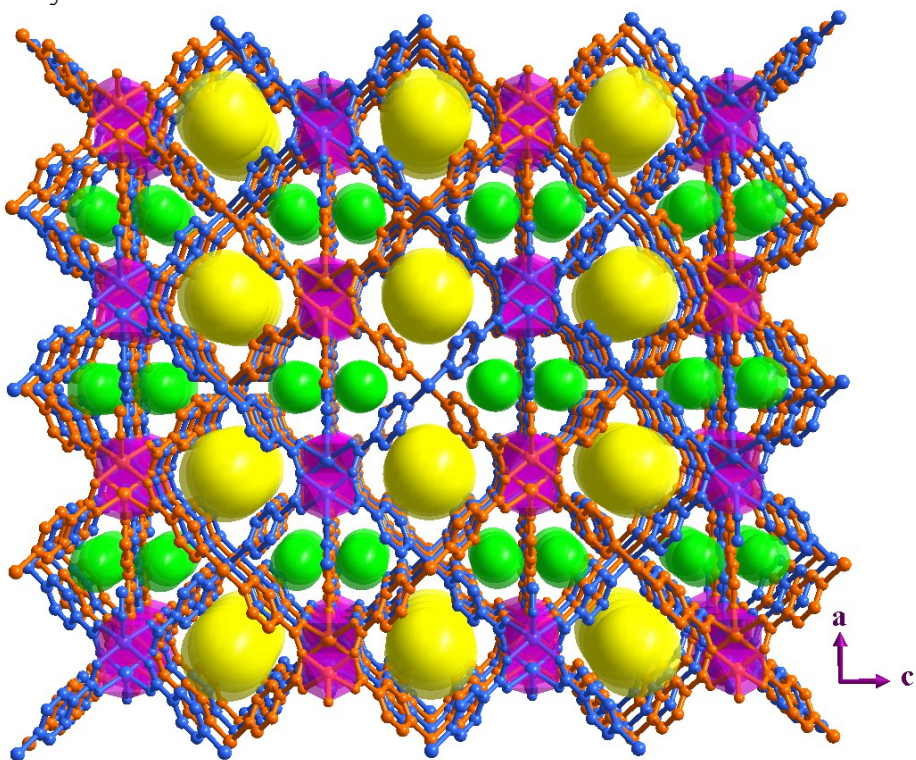

**Fig. S3** View of two types of channels in doubly-interpenetrated framework of **1** (along  $b$ -axis) shown by dummy balls in different colors.

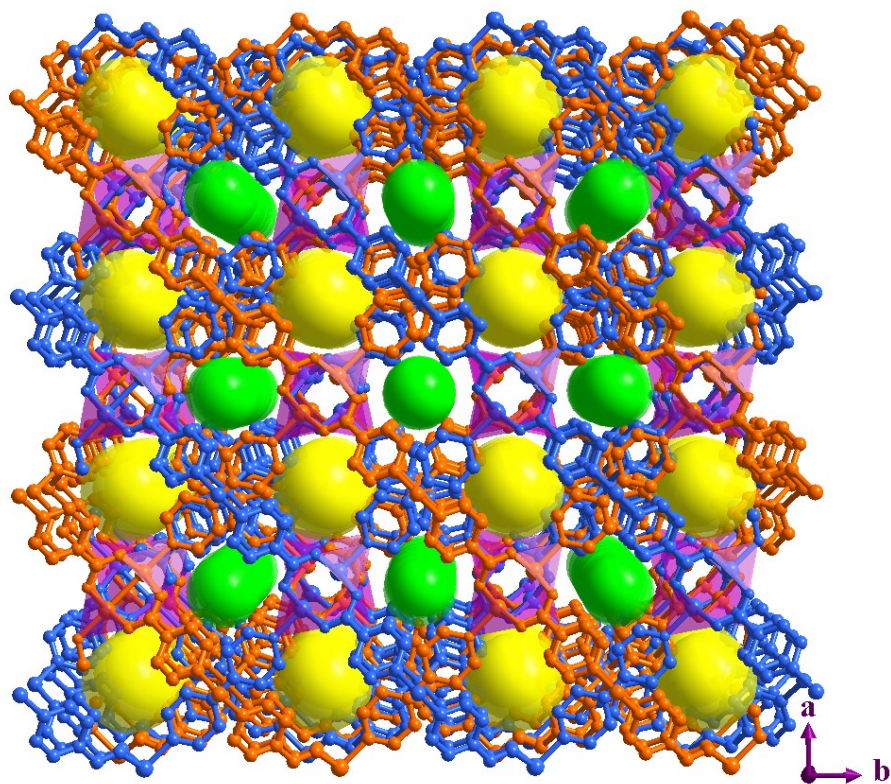

**Fig. S4** View of two types of channels in doubly-interpenetrated framework of **1** (along *c*-axis) shown by dummy balls in different colors.

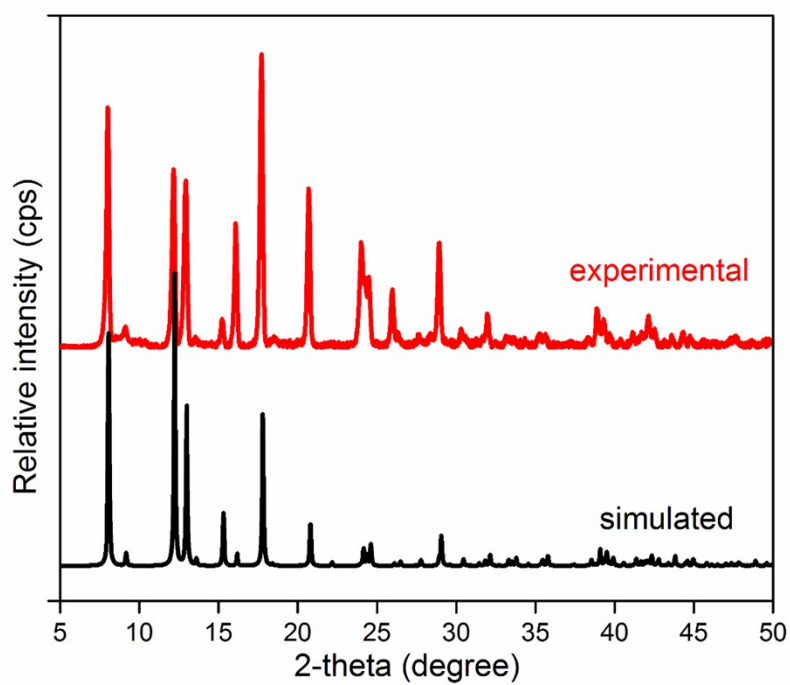

**Fig. S5** Simulated (from the single crystal data) and experimental powder X-ray diffraction patterns of **1**.

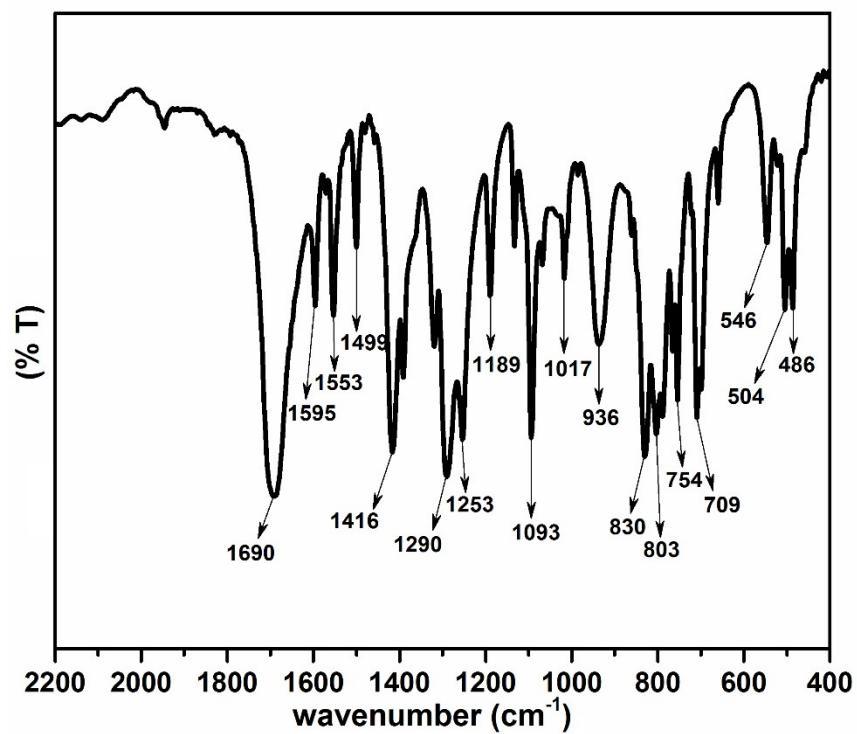

Fig. S6 FTIR spectrum of H<sub>4</sub>L.

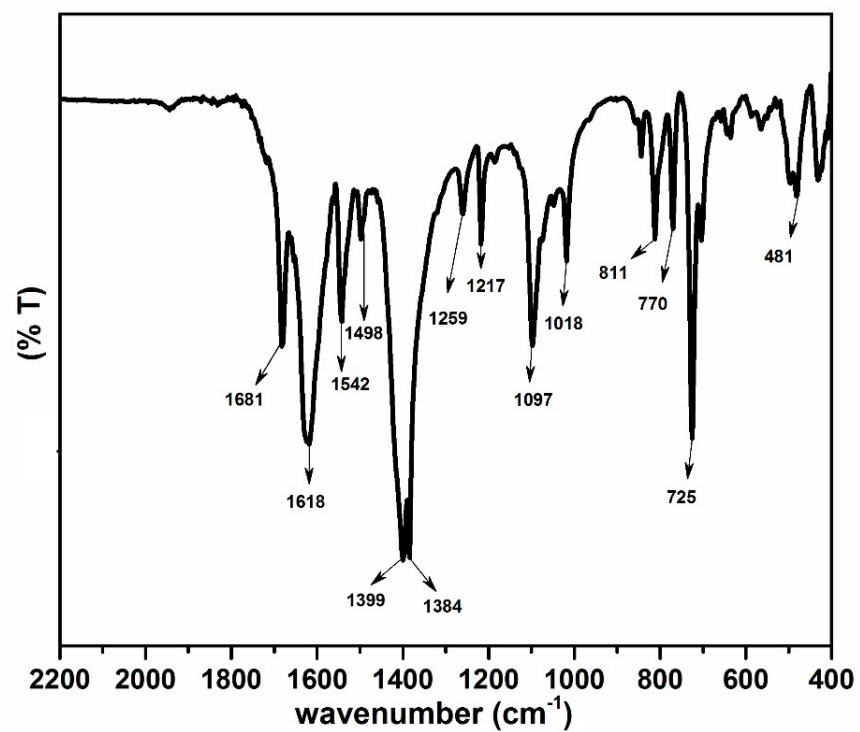

Fig. S7 FTIR spectrum of 1.

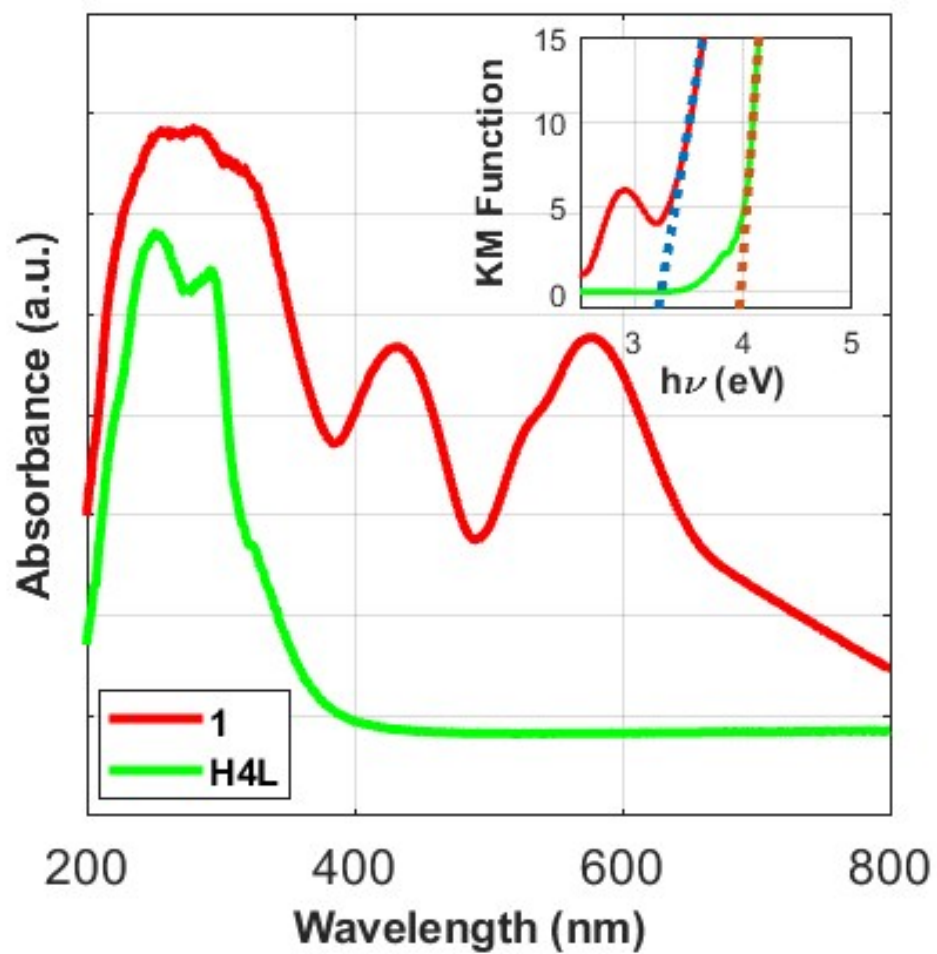

**Fig. S8** Diffuse reflectance UV-Vis spectra of **1** (red line) and H<sub>4</sub>L (green line); inset: KM function vs. energy (eV) of **1** and H<sub>4</sub>L.

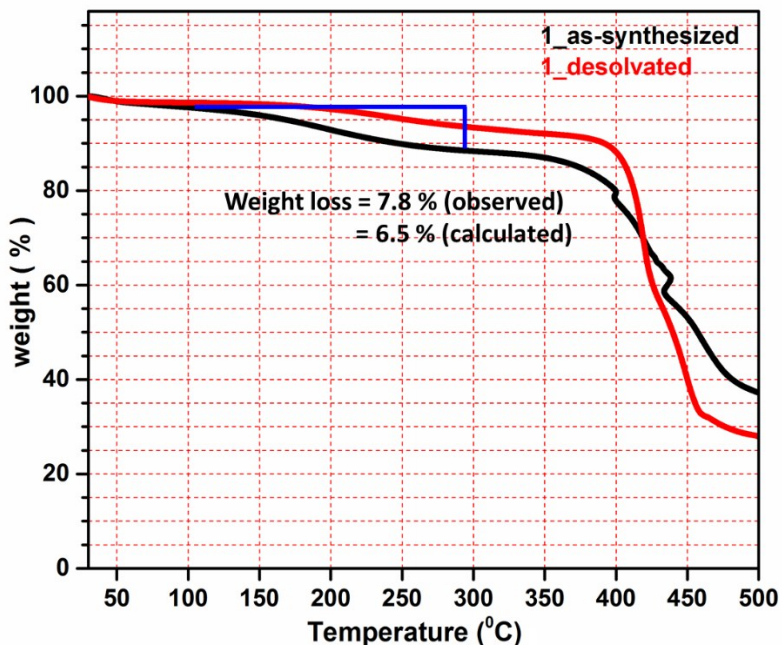

**Fig. S9** Thermogravimetric profiles of **1** (as-synthesized and de-solvated).

**Calculation of determining solvent molecules squeezed out:**

Number of electrons squeezed out = 31

Number of electrons in (1 H<sub>2</sub>O + 0.5 DMF) molecule = (10 + 20) = 30; this is in good agreement with the number of electrons squeezed out (31).

Support from the TGA analysis:

% weight loss due to (1 H<sub>2</sub>O + 0.5 DMF) molecule =  $(54.5/836) \times 100 = 6.51 \%$ ; this is in good agreement with the experimental value (7.8 %).



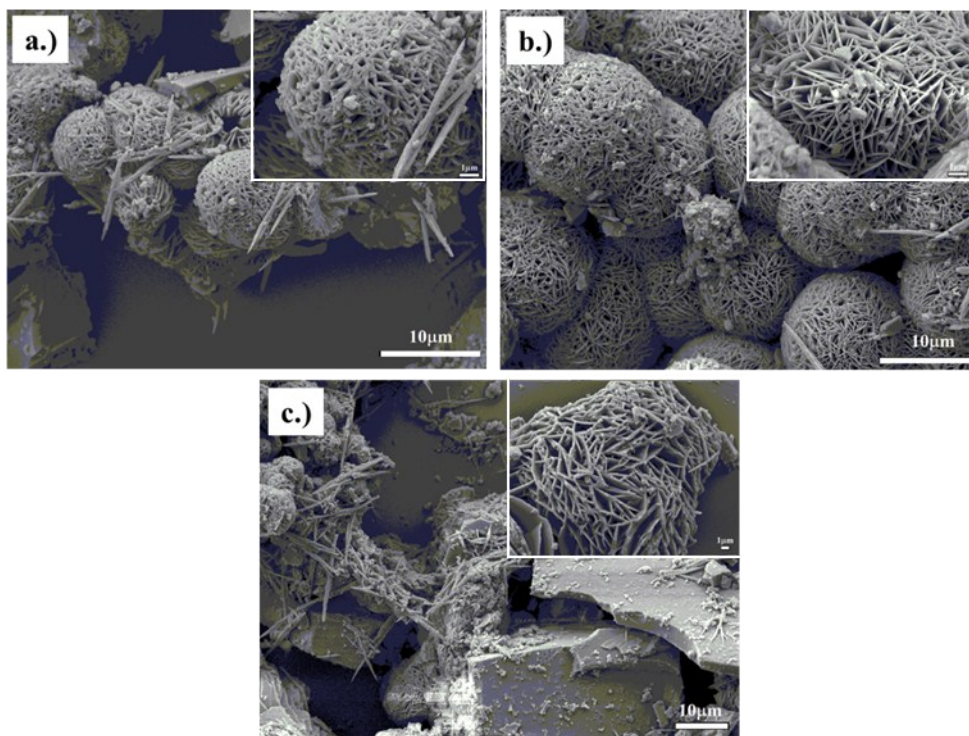

**Fig. S10** FESEM images for the (a) as-synthesized sample of **1**, (b) after water stability test and (c) after heating the as-synthesized sample of **1** up to 300 °C.

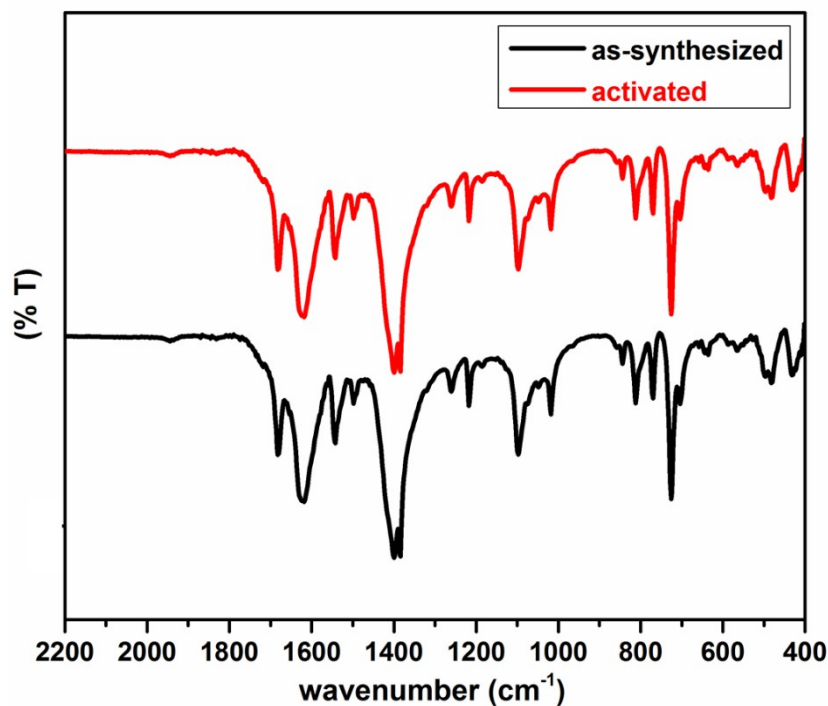

**Fig. S11** FTIR spectra of activated and as-synthesized sample of **1**.

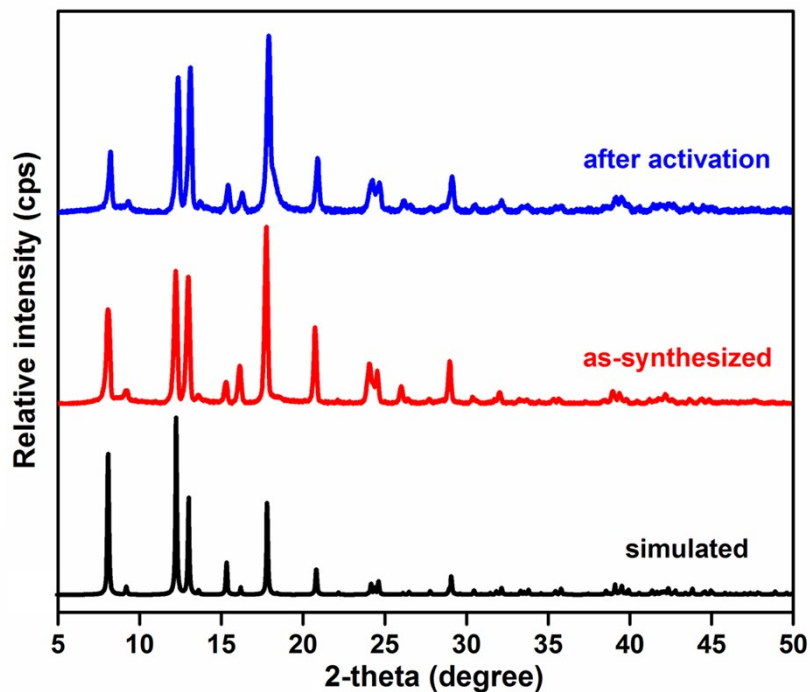

**Fig. S12** Comparison of the PXRD patterns: after activation of **1**, as-synthesized **1** and simulated from single crystal data, indicating retention of crystallinity and phase purity after the activation process.

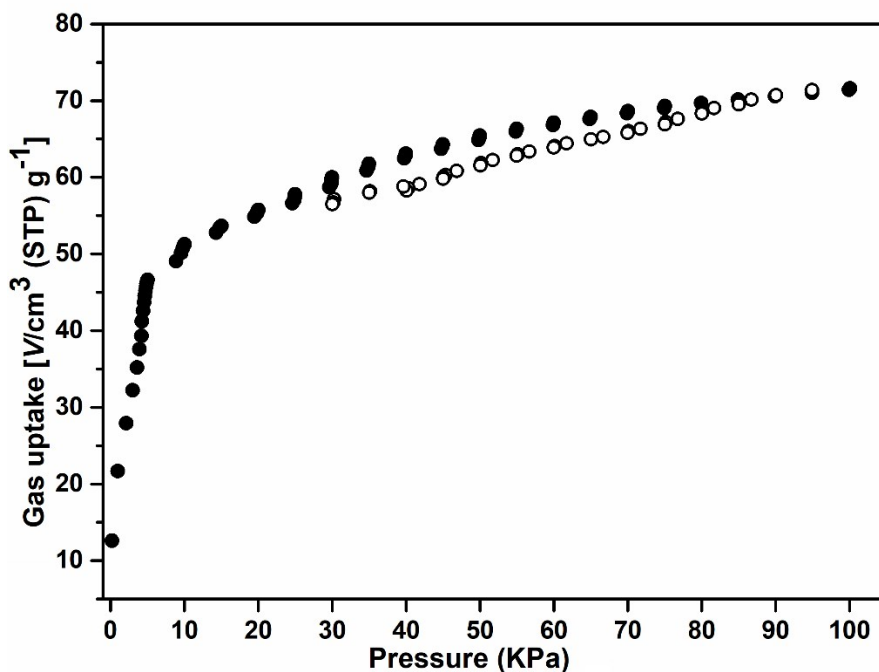

**Fig. S13** CO<sub>2</sub> sorption isotherm for **1** at 195 K. Filled circles and open circles indicate the adsorption and desorption points, respectively.

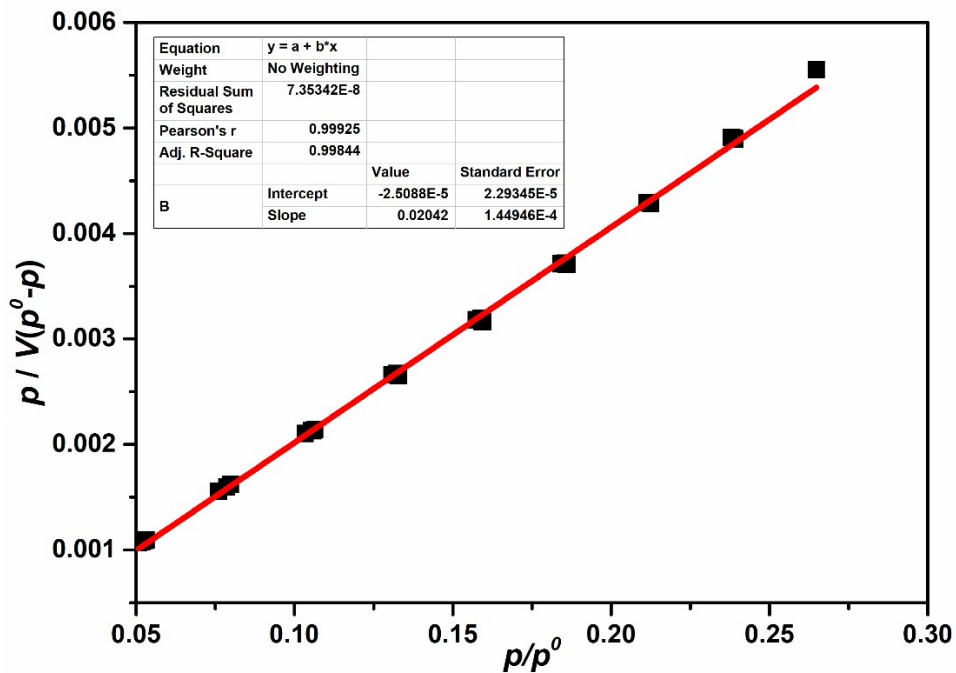

$$S_{\text{BET}} = \{[1 / (0.02042 + (-0.000025088))] / 22414\} \times 6.023 \times 10^{23} \times 0.170 \times 10^{-18} = 224 \text{ m}^2\text{g}^{-1}.$$

Fig. S14 BET surface area of **1** obtained from the CO<sub>2</sub> adsorption isotherm at 195 K.

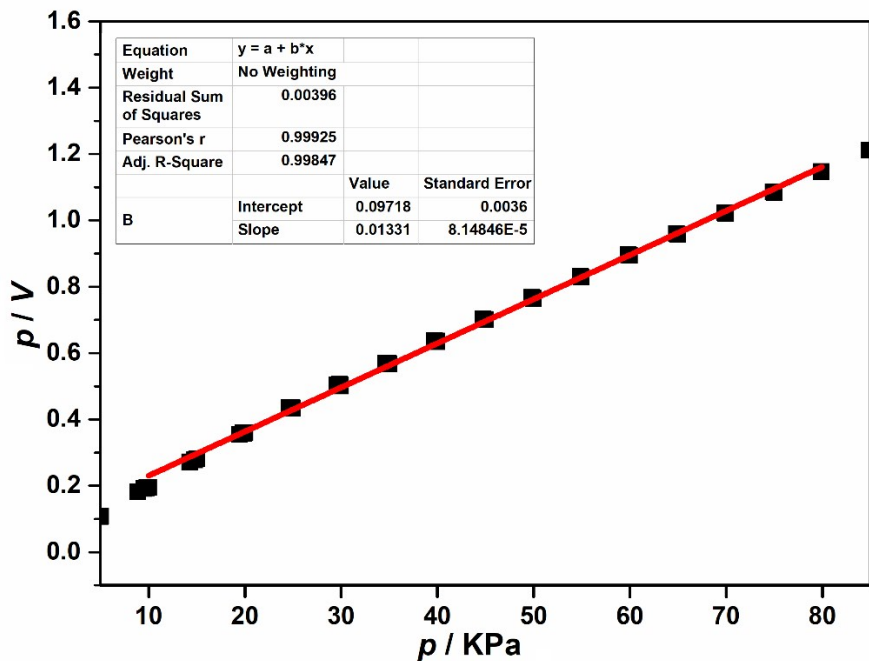

$$S_{\text{Langmuir}} = [(1 / 0.01331) / 22414] \times 6.023 \times 10^{23} \times 0.170 \times 10^{-18} = 343 \text{ m}^2\text{g}^{-1}.$$

Fig. S15 Langmuir surface area of **1** obtained from the CO<sub>2</sub> adsorption isotherm at 195 K.

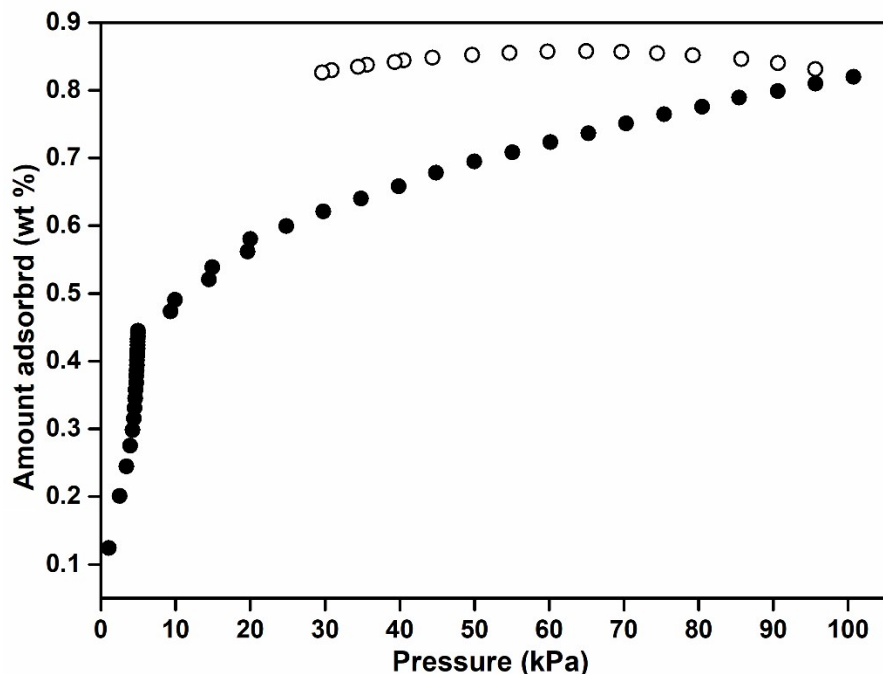

**Fig. S16** H<sub>2</sub> sorption isotherm for **1** at 77 K. Filled circles and open circles indicate the adsorption and desorption points, respectively.

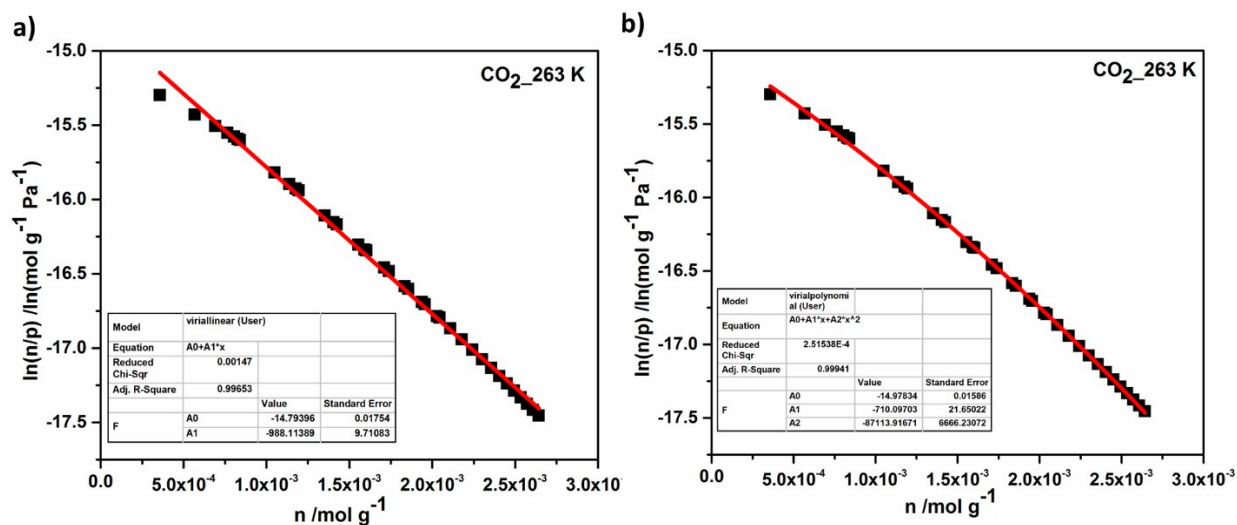

**Fig. S17** Virial graphs analysis (linear:  $\ln(n/P) = A_0 + A_1n$  and polynomial:  $\ln(n/P) = A_0 + A_1n + A_2n^2$ ) for CO<sub>2</sub> adsorption isotherms of **1** at 263 K: (a) linear equation and (b) polynomial equation.

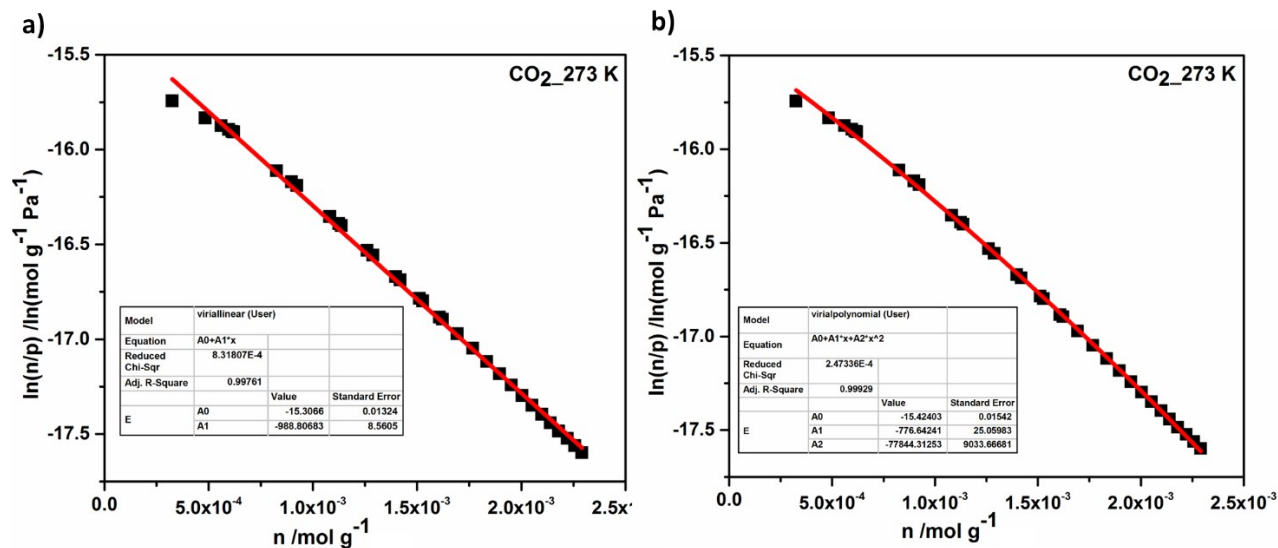

**Fig. S18** Virial graphs analysis (linear:  $\ln(n/P) = A_0 + A_1n$  and polynomial:  $\ln(n/P) = A_0 + A_1n + A_2n^2$ ) for  $\text{CO}_2$  adsorption isotherms of **1** at 273 K: (a) linear equation and (b) polynomial equation.

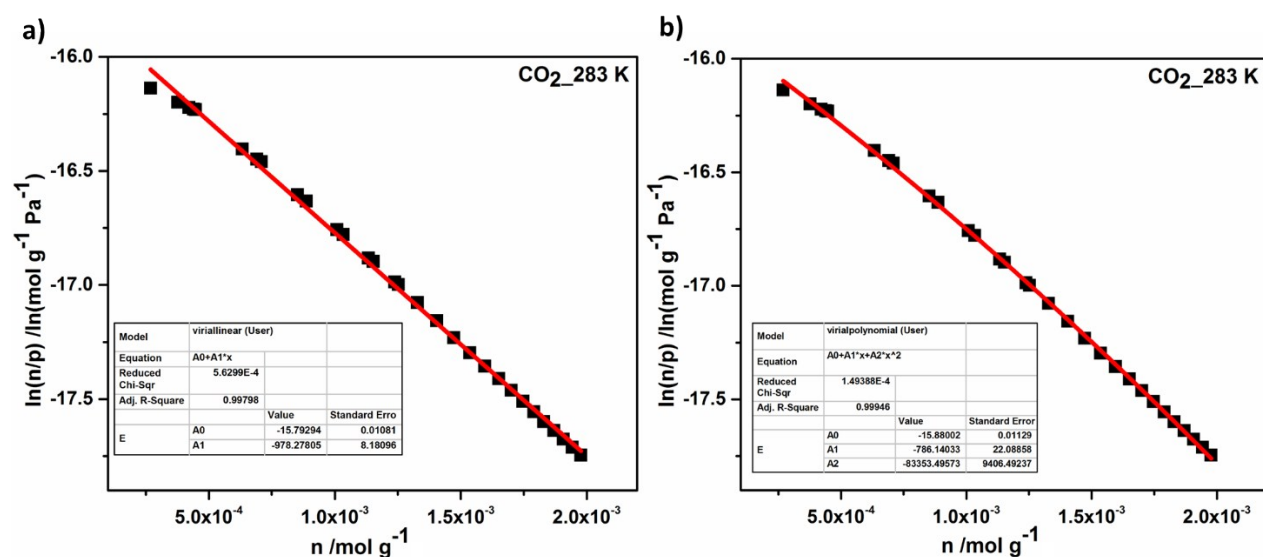

**Fig. S19** Virial graphs analysis (linear:  $\ln(n/P) = A_0 + A_1n$  and polynomial:  $\ln(n/P) = A_0 + A_1n + A_2n^2$ ) for  $\text{CO}_2$  adsorption isotherms of **1** at 283 K: (a) linear equation and (b) polynomial equation.

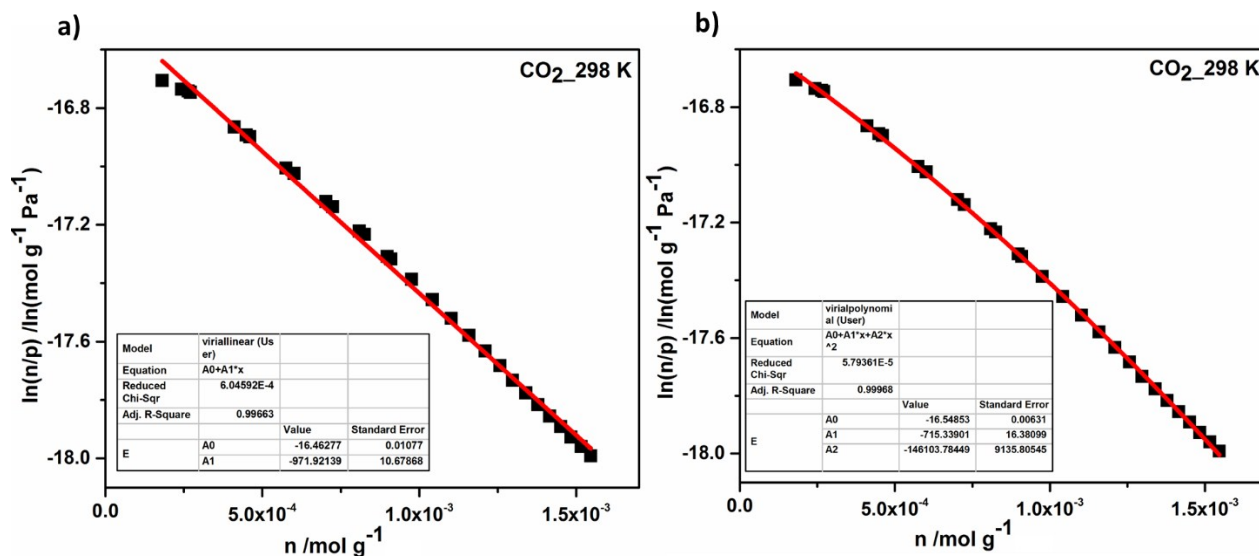

**Fig. S20** Virial graphs analysis (linear:  $\ln(n/P) = A_0 + A_1n$  and polynomial:  $\ln(n/P) = A_0 + A_1n + A_2n^2$ ) for CO<sub>2</sub> adsorption isotherms of **1** at 298 K: (a) linear equation and (b) polynomial equation.

**Table S1** Fitting parameters for virial graph analysis of **1**.

| Isotherm                   | Linear fit            |                         |                | Polynomial fit        |                         |                             |                |
|----------------------------|-----------------------|-------------------------|----------------|-----------------------|-------------------------|-----------------------------|----------------|
|                            | A <sub>0</sub>        | A <sub>1</sub>          | R <sup>2</sup> | A <sub>0</sub>        | A <sub>1</sub>          | A <sub>2</sub>              | R <sup>2</sup> |
| CO <sub>2</sub><br>(263 K) | -14.79396<br>±0.01754 | -988.11389<br>±9.71083  | 0.99653        | -14.97834<br>±0.01586 | -710.09703<br>±21.65022 | -87113.91671<br>±6666.23072 | 0.99941        |
| CO <sub>2</sub><br>(273 K) | -15.3066<br>±0.01324  | -988.80683<br>±8.5605   | 0.99761        | -15.42403<br>±0.01542 | -776.64241<br>±25.05983 | -77844.31253<br>±9033.66681 | 0.99929        |
| CO <sub>2</sub><br>(283 K) | -15.79294<br>±0.01081 | -978.27805<br>±8.18096  | 0.99798        | -15.88002<br>±0.01129 | -786.14033<br>±22.08858 | -83353.49573<br>±9406.49237 | 0.99946        |
| CO <sub>2</sub><br>(298 K) | -16.46277<br>±0.01077 | -971.32139<br>±10.67868 | 0.99663        | -16.54853<br>±0.00631 | -715.33901<br>±16.38099 | -146103.7844<br>±9135.80545 | 0.99968        |

The isosteric adsorption heat at zero coverage ( $Q_{st,0}$ ) was calculated from the gradient of plotting  $A_0$  against  $1/T$ , i.e.,  $\partial A_0 / \partial (1/T) = Q_{st,0} / R$  ( $R = 8.314 \text{ J K}^{-1} \text{ mol}^{-1}$ ).

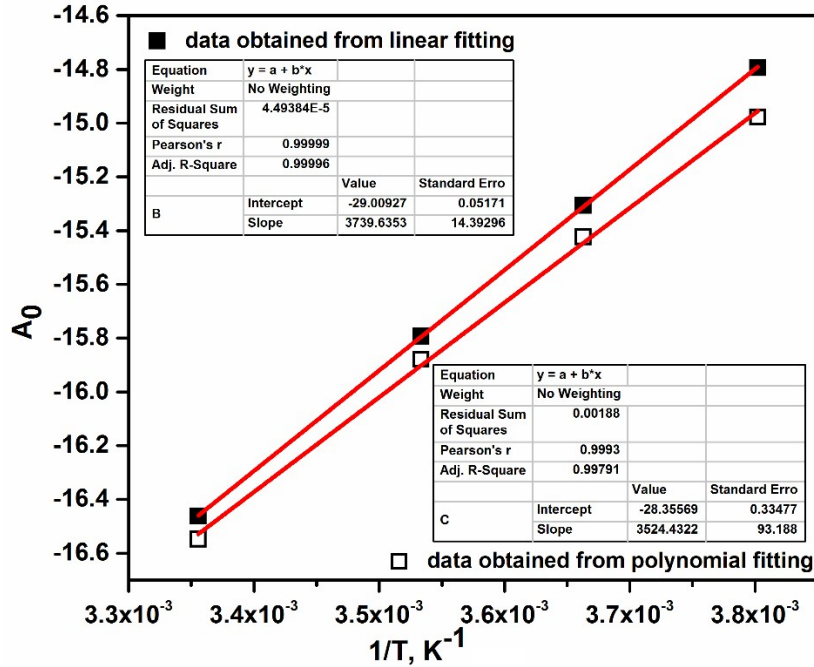

**Fig. S21** Variation of virial parameter  $A_0$  with  $1/T$  for **1**. The isosteric heat ( $Q_{st,0}$ ) of adsorption at zero surface coverage was calculated from the gradient of the straight line. The polynomial fitting of  $\ln(n/p)$  vs  $n$  gives value of  $29.30 \pm 0.77 \text{ kJ mol}^{-1}$ ; as a comparison, linear fitting gives  $31.09 \pm 0.11 \text{ kJ mol}^{-1}$ .

#### Calculation of $\text{CO}_2/\text{N}_2$ and $\text{CO}_2/\text{CH}_4$ Selectivity:

Adsorption isotherms and gas selectivities of mixed  $\text{CO}_2/\text{N}_2$  (15:85) and  $\text{CO}_2/\text{CH}_4$  (50:50) at different temperatures were calculated based on the ideal adsorbed solution theory (IAST) proposed by Myers and Prausnitz. The IAST theory assumes that the adsorbed phase is a two-dimensional solution in equilibrium with the gas phase. Both the components in the mixture behave as ideal adsorbed solution and conform to the rule analogous to Raoult's law. In order to calculate the selective sorption performance of **1** toward the separation of binary mixed gases, the parameters fitted from the single-component  $\text{CO}_2$ ,  $\text{CH}_4$  and  $\text{N}_2$  adsorption isotherms based on the single-site Langmuir-Freundlich equation as given below.

$$Q = Q_{sat} \left( \frac{Kc^n}{1 + Kc^n} \right)$$

where  $Q$  is the adsorbed amount (mmol/g),  $Q_{sat}$  is the saturation capacity (mmol/g),  $c$  is the equilibrium pressure (kPa), and  $K$  and  $1/n$  are the Langmuir and Freundlich constants. Then the fitted parameters were used to predict the molar fraction of  $A$  in the adsorbed phase using following equation:

$$Q_{sat,a} \ln\left(1 + \frac{K_a c^{n_a} y}{x}\right) - Q_{sat,b} \ln\left(1 + \frac{K_b c^{n_b} (1-y)}{(1-x)}\right) = 0$$

where  $Q_{sat,a}$ ,  $K_a$  and  $n_a$  are the Langmuir-Freundlich fitting parameters of adsorption equilibrium of pure A,  $Q_{sat,b}$ ,  $K_b$  and  $n_b$  are Langmuir-Freundlich parameters of adsorption equilibrium of pure B, and  $x$  and  $y$  are the molar fractions of A in the adsorbed phase and in bulk phase, respectively. The predicted adsorption selectivity is defined as

$$S = \left(\frac{x_1/y_1}{x_2/y_2}\right)$$

where  $x_i$  is the mole fractions of component  $i$  in the adsorbed and  $y_i$  is the mole fractions of component  $i$  in bulk phase. The IAST calculations were carried out for a binary mixture containing 15% CO<sub>2</sub> ( $y_1$ ) and 85% N<sub>2</sub> ( $y_2$ ), which is typical of flue gases and for a binary mixture containing 50% CO<sub>2</sub> ( $y_1$ ) and 50% CH<sub>4</sub> ( $y_2$ ), which is typical of landfill gases.

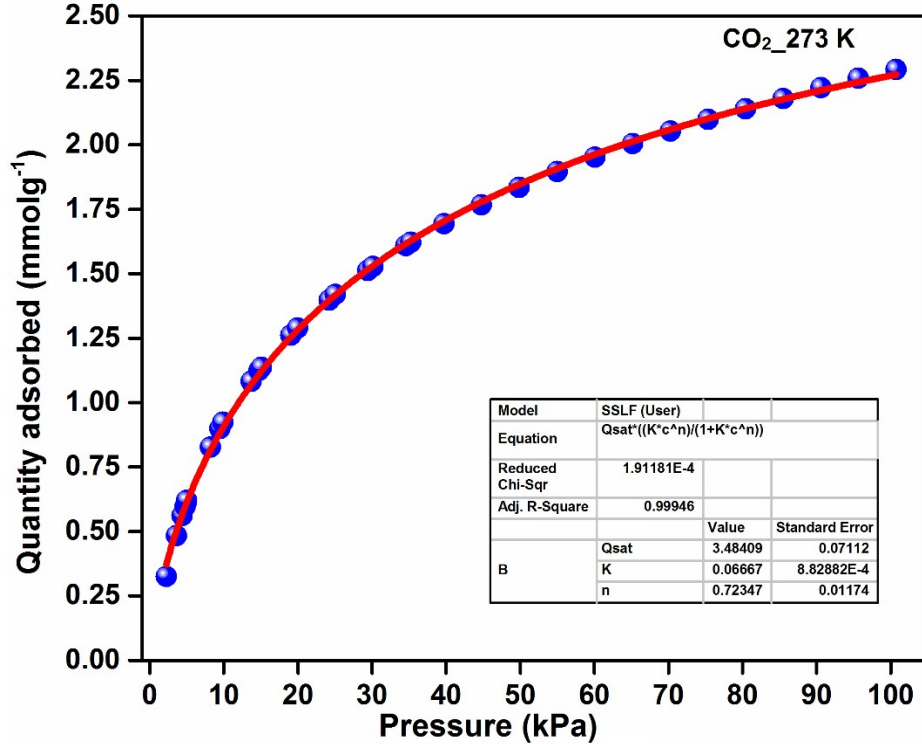

**Fig. S22** Fitting of CO<sub>2</sub> adsorption points collected at 273 K by Langmuir Freundlich adsorption model.



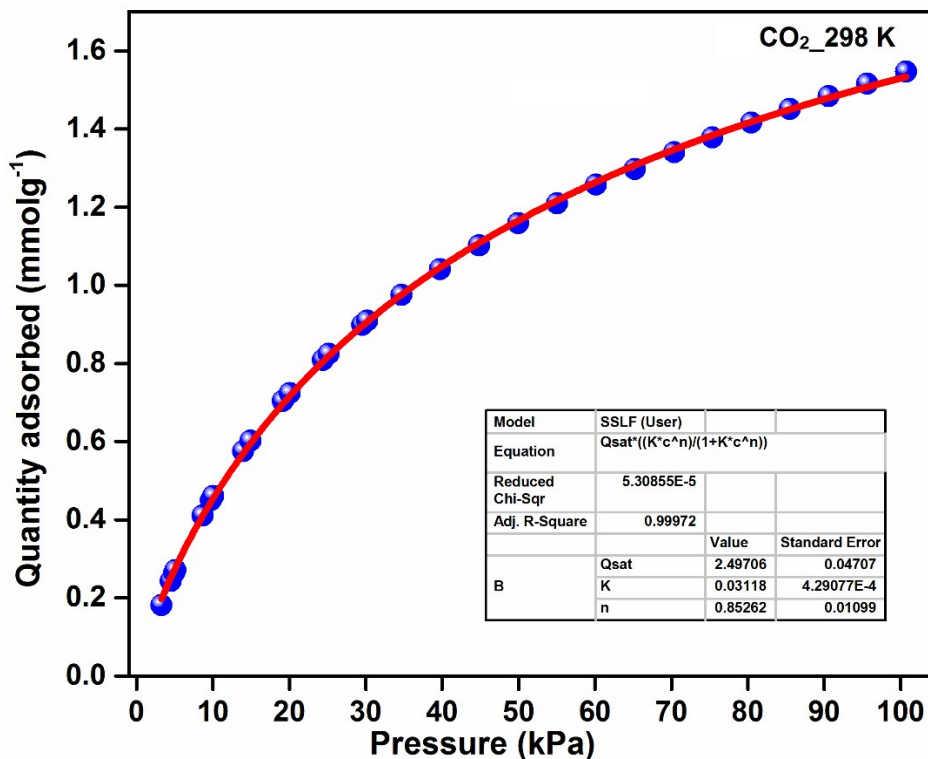

**Fig. S23** Fitting of CO<sub>2</sub> adsorption points collected at 298 K by Langmuir-Freundlich adsorption model.

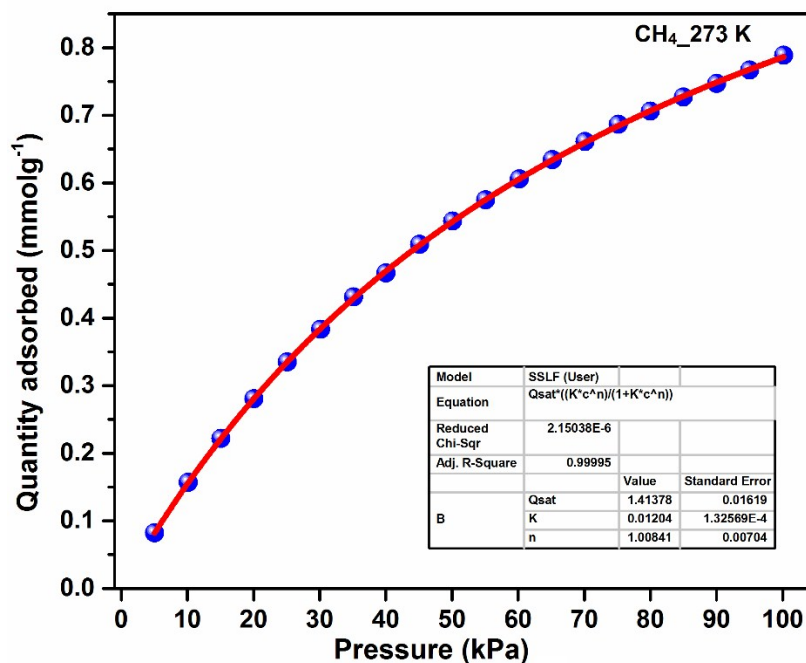

**Fig. S24** Fitting of CH<sub>4</sub> adsorption points collected at 273 K by Langmuir Freundlich adsorption model.

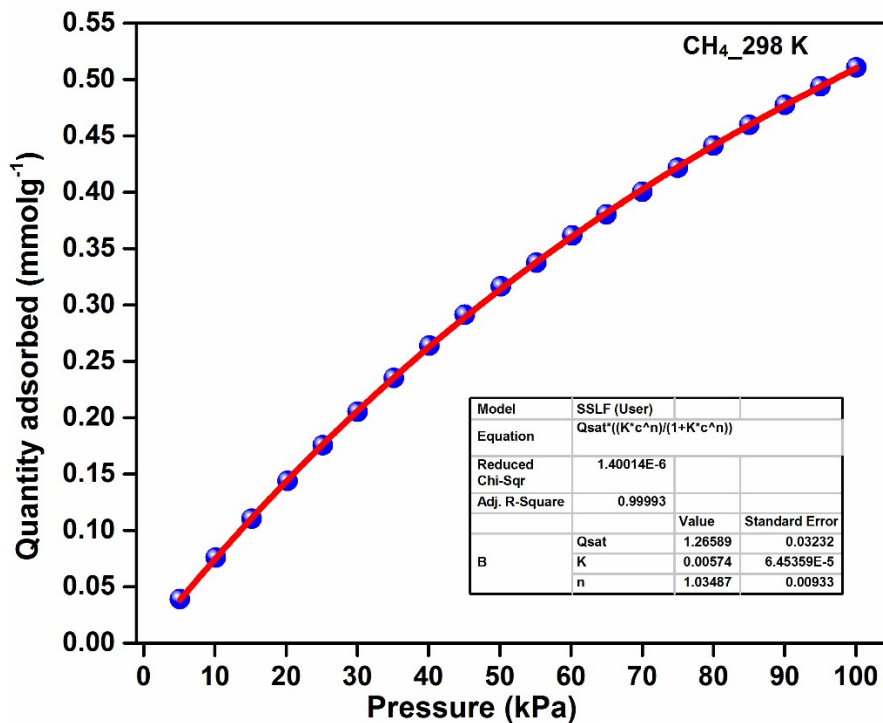

**Fig. S25** Fitting of CH<sub>4</sub> adsorption points collected at 298 K by Langmuir-Freundlich adsorption model.

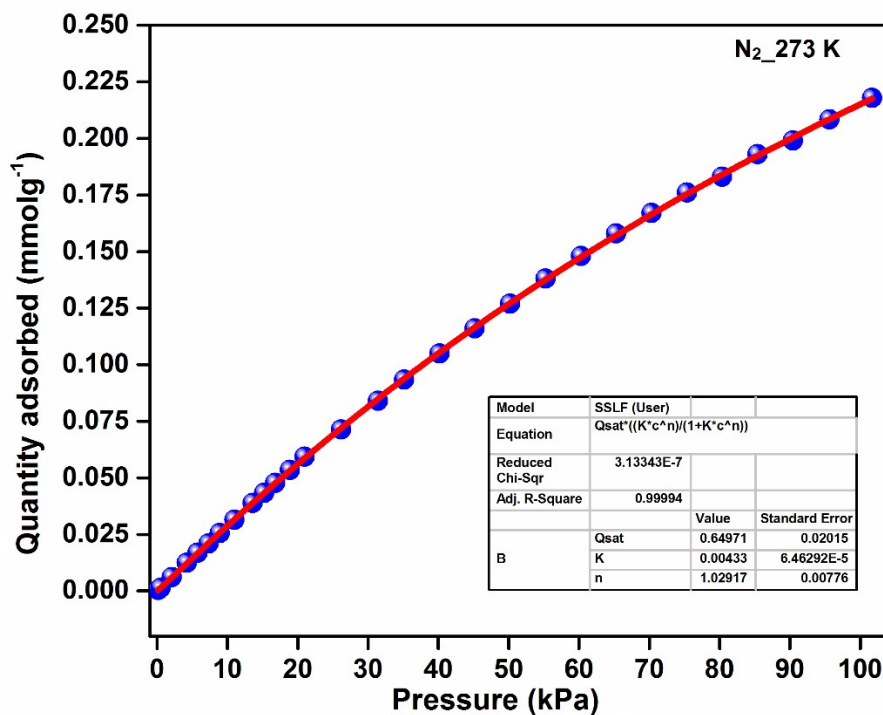

**Fig. S26** Fitting of N<sub>2</sub> adsorption points collected at 273 K by Langmuir-Freundlich adsorption model.

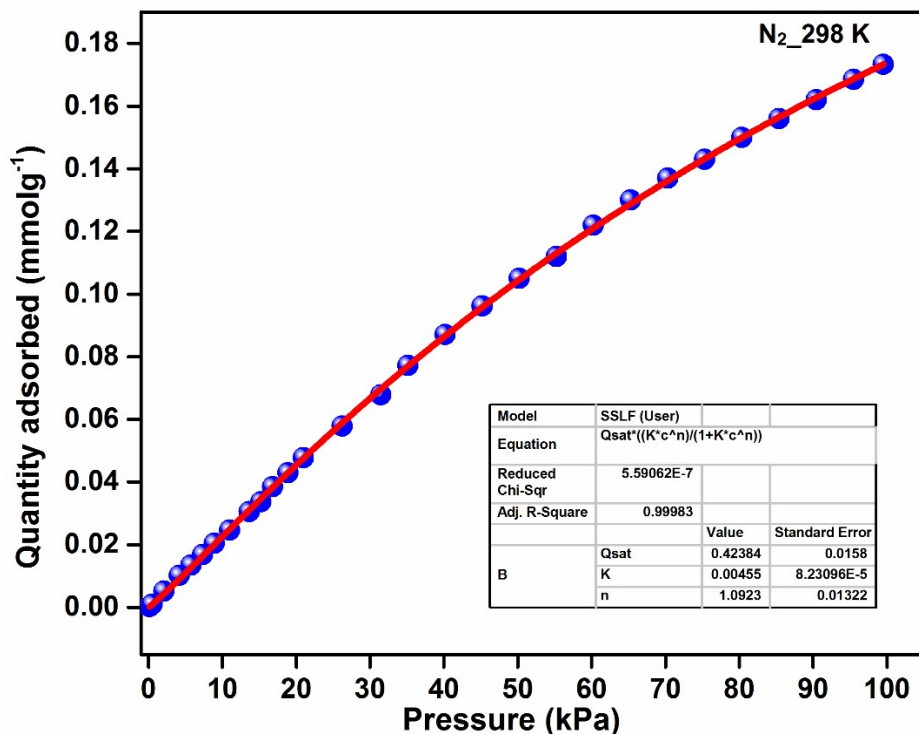

**Fig. S27** Fitting of N<sub>2</sub> adsorption points collected at 298 K by Langmuir-Freundlich adsorption model.

**Table S2** Fitting parameters for Langmuir-Freundlich fits.

| Isotherm                | Langmuir Freundlich equation: $q = Q_{sat} * [K * c^n / (1 + K * c^n)]$ |                      |                    |                |
|-------------------------|-------------------------------------------------------------------------|----------------------|--------------------|----------------|
|                         | Qsat                                                                    | K                    | n                  | R <sup>2</sup> |
| CO <sub>2</sub> (273 K) | 3.48409 ± 0.07112                                                       | 0.06667 ± 8.82882E-4 | 0.72347 ± 0.001174 | 0.99946        |
| CH <sub>4</sub> (273 K) | 1.41378 ± 0.01619                                                       | 0.01204 ± 1.32569E-4 | 1.00841 ± 0.00704  | 0.99993        |
| N <sub>2</sub> (273 K)  | 0.64971 ± 0.02015                                                       | 0.00433 ± 6.46292E-5 | 1.02917 ± 0.00776  | 0.99994        |
| CO <sub>2</sub> (298 K) | 2.49706 ± 0.04707                                                       | 0.03118 ± 4.29077E-4 | 0.85262 ± 0.01099  | 0.99972        |
| CH <sub>4</sub> (298 K) | 1.26589 ± 0.03232                                                       | 0.00574 ± 6.45359E-5 | 1.03487 ± 0.00933  | 0.99993        |
| N <sub>2</sub> (298 K)  | 0.42384 ± 0.0158                                                        | 0.00455 ± 8.23096E-5 | 1.0923 ± 0.01322   | 0.99994        |

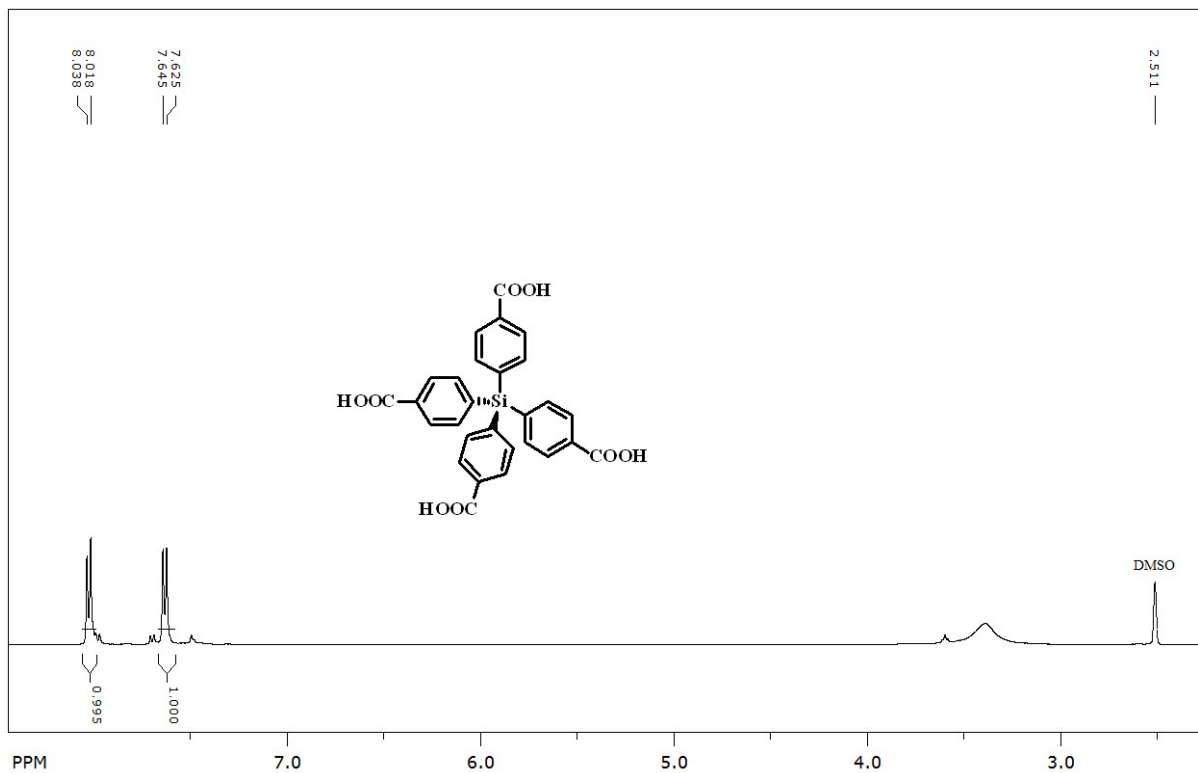

**Fig. S28**  $^1H$  NMR spectrum of  $H_4L$  in  $DMSO-d_6$ .

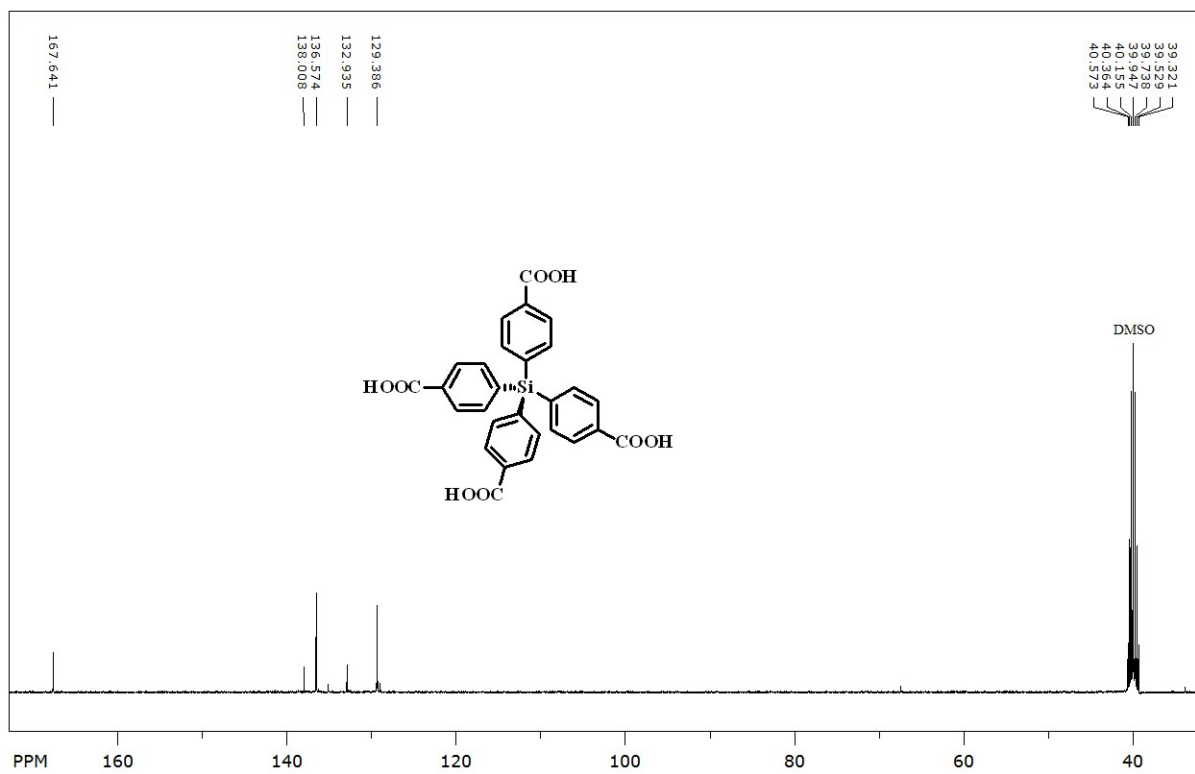

**Fig. S29**  $^{13}C$  NMR spectrum of  $H_4L$  in  $DMSO-d_6$ .

**Table S3** Single crystal data and refinement parameters for **1**.

|                                                                                                                      |                                                                                  |
|----------------------------------------------------------------------------------------------------------------------|----------------------------------------------------------------------------------|
| Chemical Formula                                                                                                     | C <sub>38</sub> H <sub>24</sub> Co <sub>2</sub> N <sub>2</sub> O <sub>8</sub> Si |
| Formula Weight                                                                                                       | 782.54 g/mol                                                                     |
| Temperature (K)                                                                                                      | 100(2)                                                                           |
| Wavelength (Å)                                                                                                       | 0.71073                                                                          |
| Crystal System                                                                                                       | tetragonal                                                                       |
| Space Group                                                                                                          | <i>P4<sub>2</sub>/mcm</i>                                                        |
| <i>a</i> (Å)                                                                                                         | 9.6299(5)                                                                        |
| <i>b</i> (Å)                                                                                                         | 9.6299(5)                                                                        |
| <i>c</i> (Å)                                                                                                         | 21.8959(12)                                                                      |
| $\alpha$ (°)                                                                                                         | 90                                                                               |
| $\beta$ (°)                                                                                                          | 90                                                                               |
| $\gamma$ (°)                                                                                                         | 90                                                                               |
| <i>Z</i>                                                                                                             | 2                                                                                |
| <i>V</i> (Å <sup>3</sup> )                                                                                           | 2030.52(2)                                                                       |
| Density (mg/cm <sup>3</sup> )                                                                                        | 1.280 g/cm <sup>3</sup>                                                          |
| $\mu$ (mm <sup>-1</sup> )                                                                                            | 0.894                                                                            |
| F(000)                                                                                                               | 796                                                                              |
| Theta (°) Range for Data Coll.                                                                                       | 2.82 to 25.08                                                                    |
| Reflections Collected                                                                                                | 34835                                                                            |
| Independent Reflections                                                                                              | 1025                                                                             |
| Reflections with <i>I</i> > 2 $\sigma$ ( <i>I</i> )                                                                  | 896                                                                              |
| <i>R</i> <sub>int</sub>                                                                                              | 0.0957                                                                           |
| No. of Parameters refined                                                                                            | 91                                                                               |
| GOF on <i>F</i> <sup>2</sup>                                                                                         | 1.151                                                                            |
| Final <i>R</i> <sub>1</sub> <sup>a</sup> / <i>wR</i> <sub>2</sub> <sup>b</sup> ( <i>I</i> > 2 $\sigma$ ( <i>I</i> )) | 0.0674/0.1605                                                                    |
| Weighted <i>R</i> <sub>1</sub> / <i>wR</i> <sub>2</sub> (all data)                                                   | 0.0769/0.1655                                                                    |
| Largest diff. peak<br>and hole(eÅ <sup>-3</sup> )                                                                    | 0.45<br>-0.41                                                                    |

---

<sup>a</sup> $R_1 = \frac{\sum |F_o| - |F_c|}{\sum |F_o|}$ . <sup>b</sup> $wR_2 = \frac{[\sum w(F_o^2 - F_c^2)^2 / \sum w(F_o^2)^2]}{1/2}$ , where  $w = 1/[\sigma^2(F_o^2) + (aP)^2 + bP]$ ,  $P = (F_o^2 + 2F_c^2)/3$

**Table S4** Selected bond lengths (Å) and angles (deg) for **1**.

| <b>Bond lengths</b>      |            |                          |            |
|--------------------------|------------|--------------------------|------------|
| Co(1)-O(1)               | 2.009(3)   | Co(1)-O(1)#2             | 2.009(3)   |
| Co(1)-O(1)#3             | 2.009(3)   | Co(1)-O(1)#4             | 2.009(3)   |
| Co(1)-N(1)               | 2.026(7)   |                          |            |
| <b>Bond Angles</b>       |            |                          |            |
| O(1)···Co(1)···O(1)#2    | 91.1(2)    | O(1)···Co(1)···O(1)#3    | 169.02(17) |
| O(1)···Co(1)···O(1)#4    | 87.9(2)    | O(1)#2···Co(1)···O(1)#3  | 87.9(2)    |
| O(1)#2···Co(1)···O(1)#4  | 169.01(17) | O(1)#3···Co(1)···O(1)#4  | 91.1(2)    |
| O(1)···Co(1)···N(1)      | 95.49(9)   | O(1)#2···Co(1)···N(1)    | 95.49(9)   |
| O(1)#3···Co(1)···N(1)    | 95.49(9)   | O(1)#4···Co(1)···N(1)    | 95.49(9)   |
| O(1)···Co(1)···Co(1)#1   | 84.51(9)   | O(1)#2···Co(1)···Co(1)#1 | 84.51(9)   |
| O(1)#3···Co(1)···Co(1)#1 | 84.51(9)   | O(1)#4···Co(1)···Co(1)#1 | 84.51(9)   |
| N(1)···Co(1)···Co(1)#1   | 180.0      |                          |            |

Symmetry codes:

(#1) 'x, y, z', (#2) '-y, x, z+1/2', (#3) 'y, -x, z+1/2', (#4) 'x, -y, -z+1/2'  
(#5) '-x, y, -z+1/2', (#6) '-x, -y, z', (#7) 'y, x, -z', (#8) '-y, -x, -z'  
(#9) '-x, -y, -z', (#10) 'y, -x, -z-1/2', (#11) '-y, x, -z-1/2', (#12) '-x, y, z-1/2'  
(#13) 'x, -y, z-1/2', (#14) 'x, y, -z', (#15) '-y, -x, z', (#16) 'y, x, z'

**Table S5**  $Q_{st}$  values of reported MOFs.

| Compound                                                     | $Q_{st}$ (kJmol <sup>-1</sup> ) | Reference         |
|--------------------------------------------------------------|---------------------------------|-------------------|
| <b>1</b>                                                     | <b>31.09</b>                    | <b>This work</b>  |
| UTSA-72a                                                     | 34.6                            | S1                |
| IITKGP-8                                                     | 35                              | S2                |
| IITKGP-6                                                     | 23                              | S3                |
| IITKGP-5                                                     | 22.6                            | S4                |
| M <sup>n</sup> MOF-20a                                       | 28.4                            | S5                |
| ROD 6                                                        | 20-21                           | S6                |
| ROD 7                                                        | 26-22                           | S6                |
| NU 1000                                                      | 17                              | S7                |
| PMF-NOTT-1                                                   | 33.09                           | S8                |
| PMF- NOTT-2                                                  | 31.86                           | S8                |
| [Zn <sub>2</sub> (L)(2,6-NDC) <sub>2</sub> ]                 | 23.3                            | S9                |
| [Cd <sub>2</sub> (L)(2,6-NDC) <sub>2</sub> ]                 | 28.1                            | S9                |
| ZnPC-2                                                       | 32                              | S10               |
| Cu-BCPPM                                                     | 29                              | S11               |
| SIFSIX-3-Zn                                                  | 45                              | S12               |
| [Co <sub>2</sub> (tzpa)(OH)(H <sub>2</sub> O) <sub>2</sub> ] | 38.5                            | S13               |
| [Cu <sub>2</sub> (L)(H <sub>2</sub> O) <sub>2</sub> ]        | 36.4                            | S14               |
| SNU-77H                                                      | 19.9                            | S15               |
| NJU-Bai13                                                    | 21.2                            | S16               |
| CuBTtri                                                      | 21                              | S17 <sup>17</sup> |
| Cu-TDPAT                                                     | 42.2                            | S18               |
| [Cu(Me-4py-trz-ia)]                                          | 30                              | S19               |
| [Zn(BTZ)]                                                    | 31.2                            | S20               |
| Mg-DOBDC                                                     | 47                              | S21               |

**Table S5**  $Q_{st}$  values of reported MOFs (cont.)

|             |      |     |
|-------------|------|-----|
| Ni-DOBDC    | 41   | S21 |
| Co-DOBDC    | 37   | S21 |
| MOF-5       | 16.5 | S22 |
| UMCM-1      | 11.9 | S23 |
| ZJNU-54a    | 24.7 | S24 |
| PCN 88      | 27   | S25 |
| JUC-199     | 29   | S26 |
| MIL-53 (Al) | 20.1 | S27 |
| HKUST-1     | 30   | S28 |
| NOTT 140a   | 24.7 | S29 |
| MIL-100     | 63   | S30 |
| CuBTTri-en  | 90   | S17 |
| NOTT 202a   | 22   | S31 |



**Table S6** Adsorption selectivity of reported MOFs for CO<sub>2</sub>/N<sub>2</sub> (15:85) and CO<sub>2</sub>/CH<sub>4</sub> (50:50) at 1 bar.

| Compound          | CO <sub>2</sub> /N <sub>2</sub> adsorption selectivity | CO <sub>2</sub> /CH <sub>4</sub> adsorption selectivity | Temperature (K) | Reference        |
|-------------------|--------------------------------------------------------|---------------------------------------------------------|-----------------|------------------|
| <b>1</b>          | <b>70.5</b>                                            | <b>9.9</b>                                              | <b>298</b>      | <b>This work</b> |
|                   | <b>194.7</b>                                           | <b>19.0</b>                                             | <b>273</b>      | <b>This work</b> |
| HKUST-1           | 101 <sup>b</sup>                                       | 7.4 <sup>a,d</sup>                                      | 293             | S28              |
| HKUST-1(hydrated) | 28 <sup>a</sup>                                        | 7.5 <sup>a</sup>                                        | 298             | S32              |
| PCN-88a           | 18 <sup>a</sup>                                        | 5 <sup>a</sup>                                          | 296             | S25              |
| PCN-61a           | 15 <sup>a</sup>                                        | NA                                                      | 298             | S33              |
| UTSA-15a          | NA                                                     | 14.2 <sup>a,d</sup>                                     | 296             | S34              |
| UTSA-16a          | 314.7 <sup>a</sup>                                     | 29.8 <sup>a,d</sup>                                     | 296             | S34              |
| UTSA-20a          | NA                                                     | 8.3 <sup>a,d</sup>                                      | 296             | S34              |
| UTSA-25a          | NA                                                     | 9.4 <sup>a,d</sup>                                      | 296             | S34              |
| UTSA-33a          | NA                                                     | 7.0 <sup>a,d</sup>                                      | 296             | S34              |
| UTSA-34a          | NA                                                     | 5.1 <sup>a,d</sup>                                      | 296             | S34              |
| UTSA-49a          | 95.8 <sup>a</sup>                                      | 33.7 <sup>a</sup>                                       | 298             | S35              |
|                   | 197.7 <sup>a</sup>                                     | 34.8 <sup>a</sup>                                       | 273             |                  |
| UTSA-72a          | 48.3 <sup>a</sup>                                      | 40.7 <sup>a</sup>                                       | 273             | S36              |
|                   | 35.6 <sup>a</sup>                                      | 9.3 <sup>a</sup>                                        | 296             |                  |
| UTSA-85a          | 55 <sup>a</sup>                                        | 11.4 <sup>a</sup>                                       | 273             | S37              |
|                   | 62.5 <sup>a</sup>                                      | 6.4 <sup>a</sup>                                        | 296             |                  |
| ZIF-68            | 18.7 <sup>c</sup>                                      | 5 <sup>c</sup>                                          | 298             | S38              |
| ZIF-69            | 19.9 <sup>c</sup>                                      | 5.1 <sup>c</sup>                                        | 298             | S38              |
| ZIF-70            | 17.3 <sup>c</sup>                                      | 5.2 <sup>c</sup>                                        | 298             | S38              |
| ZIF-78            | 41.4 <sup>a</sup>                                      | 10.4 <sup>a,d</sup>                                     | 296             | S38              |
|                   | 50.1 <sup>c</sup>                                      | 10.6 <sup>c</sup>                                       | 298             | S38              |
| ZIF-79            | 23.2 <sup>c</sup>                                      | 5.4 <sup>c</sup>                                        | 298             | S38              |
| ZIF-81            | 23.8 <sup>c</sup>                                      | 5.7 <sup>c</sup>                                        | 298             | S38              |
| ZIF-82            | 35.3 <sup>c</sup>                                      | 9.6 <sup>c</sup>                                        | 298             | S38              |
| ZIF-95            | 18±1.7 <sup>c</sup>                                    | 4.3±0.4 <sup>c</sup>                                    | 298             | S38              |
| ZIF-100           | 25±2.4 <sup>c</sup>                                    | 5.9±0.4 <sup>c</sup>                                    | 298             | S38              |
| IITKGP-8          | 106 <sup>a</sup>                                       | 17.7 <sup>a</sup>                                       | 273             | S2               |
|                   | 43.7 <sup>a</sup>                                      | 17.1 <sup>a</sup>                                       | 295             |                  |
| IITKGP-7          | 57 <sup>a</sup>                                        | 8.4 <sup>a</sup>                                        | 273             | S39              |
|                   | 121.4 <sup>a</sup>                                     | 8.8 <sup>a</sup>                                        | 295             |                  |
| IITKGP-6          | 51.3 <sup>a</sup>                                      | 36 <sup>a</sup>                                         | 273             | S3               |
|                   | 42.8 <sup>a</sup>                                      | 5.1 <sup>a</sup>                                        | 295             |                  |
| IITKGP-5          | 435.5 <sup>a</sup>                                     | 151.6 <sup>a</sup>                                      | 273             | S4               |
|                   | 147.8 <sup>a</sup>                                     | 23.8 <sup>a</sup>                                       | 295             |                  |
| SIFSIX-1-Cu       | 27 <sup>a</sup>                                        | 11 <sup>a</sup>                                         | 298             | S12              |
| SIFSIX-2-Cu       | 13.7 <sup>a</sup>                                      | 5.3 <sup>a</sup>                                        | 298             | S12              |
| SIFSIX-2-Cu-i     | 140 <sup>a</sup>                                       | 33 <sup>a</sup>                                         | 298             | S12              |

**Table S6** Adsorption selectivity of reported MOFs for CO<sub>2</sub>/N<sub>2</sub> (15:85) and CO<sub>2</sub>/CH<sub>4</sub> (50:50) at 1 bar (cont.)

|                                       |                    |                      |     |     |
|---------------------------------------|--------------------|----------------------|-----|-----|
| TIFSIX-1-Cu                           | 30 <sup>a</sup>    | 11 <sup>a</sup>      | 298 | S40 |
| SNFSIX-1-Cu                           | 22 <sup>a</sup>    | 12 <sup>a</sup>      | 298 | S40 |
| Cu-BTtri                              | 21 <sup>a</sup>    | NA                   | 298 | S17 |
| en-Cu-BTtri                           | 25 <sup>a</sup>    | NA                   | 298 | S17 |
| mmen-Cu-BTtri                         | 327 <sup>a</sup>   | NA                   | 298 | S41 |
| mmen-Mg <sub>2</sub> (dobpdc)         | 329 <sup>a</sup>   | NA                   | 298 | S42 |
| Cu <sub>24</sub> (TPBTM) <sub>8</sub> | 22 <sup>a</sup>    | NA                   | 298 | S33 |
| Zn <sub>2</sub> (HDDCBA)              | NA                 | 8.9 <sup>a</sup>     | 273 | S43 |
|                                       | NA                 | 8.1 <sup>a</sup>     | 298 |     |
| Cu-TDPAT                              | 57.8 <sup>a</sup>  | 13.8 <sup>a,d</sup>  | 296 | S34 |
| Mg-MOF-74                             | 182.1 <sup>a</sup> | 105.1 <sup>a,d</sup> | 296 | S34 |
| Zn-MOF-74                             | 87.7 <sup>a</sup>  | 5 <sup>a</sup>       | 296 | S34 |
| MOF-177                               | 3.6 <sup>a</sup>   | NA                   | 296 | S34 |
| Bio-MOF-11                            | 79.5 <sup>a</sup>  | NA                   | 296 | S34 |
| In <sub>2</sub> X                     | 250 <sup>a</sup>   | 6.4 <sup>a</sup>     | 273 | S44 |
|                                       | NA                 | 5.6 <sup>a</sup>     | 298 |     |
| [ZnLi(PTCA)]                          | 126 <sup>a</sup>   | 26 <sup>a</sup>      | 298 | S45 |
|                                       | 277 <sup>a</sup>   | 35 <sup>a</sup>      | 273 |     |
| MIL-101                               | NA                 | 9.6 <sup>a,d</sup>   | 296 | S34 |
|                                       | NA                 | 5.6 <sup>a</sup>     | 298 |     |
| ZJNU-44a                              | 15 <sup>a</sup>    | 5.5 <sup>a</sup>     | 296 | S46 |
| PMOF-3a                               | 29.2 <sup>a</sup>  | 8 <sup>a</sup>       | 273 | S47 |
|                                       | 23.4 <sup>a</sup>  | 5.1 <sup>a</sup>     | 296 |     |
| JUC-141                               | 21.6 <sup>a</sup>  | 4.2 <sup>a</sup>     | 273 | S48 |
|                                       | 27.6 <sup>a</sup>  | 8.7 <sup>a</sup>     | 298 |     |
| NOTT-202a                             | 26.7 <sup>a</sup>  | 2.9 <sup>b</sup>     | 273 | S31 |
|                                       | 4.3 <sup>b</sup>   | 1.4 <sup>b</sup>     | 293 |     |
| MAF-66                                | 403 <sup>b</sup>   | 7.5 <sup>b</sup>     | 273 | S49 |
|                                       | 225 <sup>b</sup>   | 5.8 <sup>b</sup>     | 298 |     |
| Cu-SSZ13(zeolite)                     | 67.4 <sup>a</sup>  | NA                   | 296 | S34 |
| H-SSZ13(zeolite)                      | 71.3 <sup>a</sup>  | NA                   | 296 | S34 |
| Zeolite MF1                           | 11.2 <sup>a</sup>  | 2.5 <sup>a,d</sup>   | 296 | S34 |
| NaX zeolite                           | 145.9 <sup>a</sup> | 60 <sup>a,d</sup>    | 296 | S34 |
| JBW zeolite                           | 524.4 <sup>a</sup> | 685.5 <sup>a,d</sup> | 296 | S34 |

a: IAST selectivity; b: selectivity from Henry's Law; c: from slopes of adsorption isotherms at low pressure; d: selectivity at 2 bar.

## References:

- S1 H. Alawisi, B. Li, Y. He, H. D. Arman, A. M. Asiri, H. Wang and B. Chen, *Cryst. Growth Des.*, 2014, **14**, 2522–2526.
- S2 S. Chand, A. Pal and M. C. Das, *Chem. - A Eur. J.*, 2018, 5982–5986.
- S3 A. Pal, S. Chand and M. C. Das, *Inorg. Chem.*, 2017, **56**, 13991–13997.
- S4 A. Pal, S. Chand, S. M. Elahi and M. C. Das, *Dalt. Trans.*, 2017, **46**, 15280–15286.
- S5 Z. Zhang, S. Xiang, K. Hong, M. C. Das, H. D. Arman, M. Garcia, J. U. Mondal, K. M. Thomas and B. Chen, *Inorg. Chem.*, 2012, **51**, 4947–4953.
- S6 R.-J. Li, M. Li, X.-P. Zhou, D. Li and M. O’Keeffe, *Chem. Commun.*, 2014, **50**, 4047–4049.
- S7 P. Deria, J. E. Mondloch, E. Tylianakis, P. Ghosh, W. Bury, R. Q. Snurr, J. T. Hupp and O. K. Farha, *J. Am. Chem. Soc.*, 2013, **135**, 16801–16804.
- S8 B. Xiao, T. L. Easun, A. Dhakshinamoorthy, I. Cebula, P. H. Beton, J. J. Titman, H. Garcia, K. M. Thomas and M. Schröder, *J. Mater. Chem. A*, 2014, **2**, 19889–19896.
- S9 D. Zhao, X.-H. Liu, J.-H. Guo, H.-J. Xu, Y. Zhao, Y. Lu and W.-Y. Sun, *Inorg. Chem.*, 2018, **57**, 2695–2704.
- S10 Y. Ling, M. Deng, Z. Chen, B. Xia, X. Liu, Y. Yang, Y. Zhou and L. Weng, *Chem. Commun.*, 2013, **49**, 78–80.
- S11 W. M. Bloch, R. Babarao, M. R. Hill, C. J. Doonan and C. J. Sumbly, *J. Am. Chem. Soc.*, 2013, **135**, 10441–10448.
- S12 P. Nugent, Y. Belmabkhout, S. D. Burd, A. J. Cairns, R. Luebke, K. Forrest, T. Pham, S. Ma, B. Space, L. Wojtas, M. Eddaoudi and M. J. Zaworotko, *Nature*, 2013, **495**, 80–84.
- S13 H. H. Wang, L. Hou, Y. Z. Li, C. Y. Jiang, Y. Y. Wang and Z. Zhu, *ACS Appl. Mater. Interfaces*, 2017, **9**, 17969–17976.
- S14 C.-Y. Gao, H.-R. Tian, J. Ai, L.-J. Li, S. Dang, Y.-Q. Lan and Z.-M. Sun, *Chem. Commun.*, 2016, **52**, 11147–11150.
- S15 H. J. Park, D. W. Lim, W. S. Yang, T. R. Oh and M. P. Suh, *Chem. - A Eur. J.*, 2011, **17**, 7251–7260.
- S16 Z. Lu, L. Du, B. Zheng, J. Bai, M. Zhang and R. Yun, *CrystEngComm*, 2013, **15**, 9348.
- S17 A. Demessence, D. M. D’Alessandro, M. L. Foo, J. R. Long, D. M. D’Alessandro, M. L. Foo and J. R. Long, *J. Am. Chem. Soc.*, 2009, **131**, 8784–8786.
- S18 B. Li, Z. Zhang, Y. Li, K. Yao, Y. Zhu, Z. Deng, F. Yang, X. Zhou, G. Li, H. Wu, N. Nijem, Y. J. Chabal, Z. Lai, Y. Han, Z. Shi, S. Feng and J. Li, *Angew. Chemie - Int. Ed.*, 2012, **51**, 1412–1415.
- S19 D. Lässig, J. Lincke, J. Moellmer, C. Reichenbach, A. Moeller, R. Gläser, G. Kalies, K. A. Cychosz, M. Thommes, R. Staudt and H. Krautscheid, *Angew. Chemie - Int. Ed.*, 2011, **50**,

- 10344–10348.
- S20 P. Cui, Y. G. Ma, H. H. Li, B. Zhao, J. R. Li, P. Cheng, P. B. Balbuena and H. C. Zhou, *J. Am. Chem. Soc.*, 2012, **134**, 18892–18895.
- S21 S. R. Caskey, A. G. Wong-Foy and A. J. Matzger, Department, *J. Am. Chem. Soc.*, 2008, **130**, 10870–10871.
- S22 J. S. Choi, W. J. Son, J. Kim and W. S. Ahn, *Microporous Mesoporous Mater.*, 2008, **116**, 727–731.
- S23 B. Mu, P. M. Schoenecker and K. S. Walton, *J. Phys. Chem. C*, 2010, **114**, 6464–6471.
- S24 J. Jiao, L. Dou, H. Liu, F. Chen, D. Bai, Y. Feng, S. Xiong, D.-L. Chen and Y. He, *Dalton Trans.*, 2016, **45**, 13373–13382.
- S25 J. R. Li, J. Yu, W. Lu, L. B. Sun, J. Sculley, P. B. Balbuena and H. C. Zhou, *Nat. Commun.*, 2013, **4**, 1538.
- S26 H. He, F. Sun, B. Aguila, J. A. Perman, S. Ma and G. Zhu, *J. Mater. Chem. A*, 2016, **4**, 15240–15246.
- S27 L. Bastin, P. S. Ba, E. J. Hurtado, A. C. Silva, A. E. Rodrigues and B. Chen, *J. Phys. Chem. C*, 2008, **112**, 1575–1581.
- S28 Z. Liang, M. Marshall and A. L. Chaffee, *Energy and Fuels*, 2009, 2785–2789.
- S29 C. Tan, S. Yang, N. R. Champness, X. Lin, A. J. Blake, W. Lewis and M. Schröder, *Chem. Commun.*, 2011, **47**, 4487.
- S30 P. L. Llewellyn, S. Bourrelly, C. Serre, A. Vimont, M. Daturi, L. Hamon, G. De Weireld, J. Chang, D. Hong, Y. K. Hwang and S. H. Jung, *Langmuir*, 2008, 7245–7250.
- S31 S. Yang, X. Lin, W. Lewis, M. Suyetin, E. Bichoutskaia, J. E. Parker, C. C. Tang, D. R. Allan, P. J. Rizkallah, P. Hubberstey, N. R. Champness, K. Mark Thomas, A. J. Blake and M. Schröder, *Nat. Mater.*, 2012, **11**, 710–716.
- S32 O. Yazaydin, A. I. Benin, S. a Faheem, P. Jakubczak, J. J. Low, R. R. Willis and R. Q. Snurr, *Chem. Mater.*, 2009, **21**, 1425–1430.
- S33 B. Zheng, J. Bai, J. Duan, L. Wojtas and M. J. Zaworotko, *J. Am. Chem. Soc.*, 2011, **133**, 748–751.
- S34 S. Xiang, Y. He, Z. Zhang, H. Wu, W. Zhou, R. Krishna and B. Chen, *Nat. Commun.*, 2012, **3**, 954–959.
- S35 S. Xiong, Y. Gong, H. Wang, H. Wang, Q. Liu, M. Gu, X. Wang, B. Chen and Z. Wang, *Chem. Commun.*, 2014, **50**, 12101–12104.
- S36 H. Alawisi, B. Li, Y. He, H. D. Arman, A. M. Asiri, H. Wang and B. Chen, *Cryst. Growth Des.*, 2014, **14**, 2522–2526.
- S37 O. Alduhaish, H. Wang, B. Li, H. D. Arman, V. Nesterov, K. Alfooty and B. Chen, *Chempluschem*, 2016, **81**, 764–769.

- S38 A. Phan, C. J. Doonan, F. J. Uribe-Romo, C. B. Knobler, M. O’Keeffe and O. M. Yaghi, *Acc Chem Res*, 2010, **43**, 58–67.
- S39 A. Pal, J. Bin Lin, S. Chand and M. C. Das, *ChemistrySelect*, 2018, **3**, 917–921.
- S40 P. Nugent, V. Rhodus, T. Pham, B. Tudor, K. Forrest, L. Wojtas, B. Space and M. Zaworotko, *Chem. Commun.*, 2013, **49**, 1606.
- S41 T. M. McDonald, D. M. D’Alessandro, R. Krishna and J. R. Long, *Chem. Sci.*, 2011, **2**, 2022.
- S42 T. M. McDonald, W. R. Lee, J. A. Mason, B. M. Wiers, C. S. Hong and J. R. Long, *J. Am. Chem. Soc.*, 2012, **134**, 7056–7065.
- S43 J. Li, G. P. Yang, S. L. Wei, R. C. Gao, N. N. Bai and Y. Y. Wang, *Cryst. Growth Des.*, 2015, **15**, 5382–5387.
- S44 Z. J. Lin, Y. B. Huang, T. F. Liu, X. Y. Li and R. Cao, *Inorg. Chem.*, 2013, **52**, 3127–3132.
- S45 Y.-L. Huang, D.-C. Zhong, L. Jiang, Y.-N. Gong and T.-B. Lu, *Inorg. Chem.*, 2017, **56**, 705–708.
- S46 C. Song, J. Hu, Y. Ling, Y. Feng, R. Krishna, D. Chen and Y. He, *J. Mater. Chem. A*, 2015, **3**, 19417–19426.
- S47 O. Alduhaish, H. Wang, B. Li, T. L. Hu, H. D. Arman, K. Alfooty and B. Chen, *Chempluschem*, 2016, **81**, 770–774.
- S48 N. Zhao, F. Sun, P. Li, X. Mu and G. Zhu, *Inorg. Chem.*, 2017, **56**, 6938–6942.
- S49 R. B. Lin, D. Chen, Y. Y. Lin, J. P. Zhang and X. M. Chen, *Inorg. Chem.*, 2012, **51**, 9950–9955.
